# Supplementary material for: Entropy engineering enhances the electromagnetic wave absorption of high-entropy transition metal dichalcogenides/N-doped carbon nanofiber composites
Source: Royal Society of Chemistry journal article supplement (doi:10.1039/d3mh01625k), 2023-12-08
Supplement: d3mh01625k1.pdf [file d3mh01625k1.pdf]

*Electronic supplementary information for*

**Entropy engineering enhances the electromagnetic wave absorption of high-entropy transition metal dichalcogenides/N-doped carbon nanofiber composites**

Shipeng Wang<sup>a</sup>, Qiangchun Liu<sup>c</sup>, Shikuo Li<sup>\*a,b</sup>, Fangzhi Huang<sup>\*b</sup>, and Hui Zhang<sup>\*a,b</sup>

<sup>a</sup> Anhui Key Laboratory of Magnetic Functional Materials and Devices, School of Materials Science and Engineering, Anhui University, Hefei, 230601, P.R. China

<sup>b</sup> School of Chemistry and Chemical Engineering, Anhui University, Hefei, 230601, PR China

<sup>c</sup> School of Physics and Electronic Information, Huaibei Normal University, Huaibei 235000, China

\*Corresponding author: Shikuo Li E-mail: lishikuo@ahu.edu.cn; Fangzhi Huang E-mail: huangfangzhi@163.com; Hui Zhang E-mail: zhui@ahu.edu.cn

**Formula S1: configurational entropy:**

The calculation of configurational entropy for as-prepared samples could be made following the equation:

$$\Delta S_{mix} = -R \sum_{i=1}^n c_i \ln c_i$$

Where  $\Delta S_{mix}$  is the configurational entropy of mixing, R is the gas constant, and  $c_i$  is the molar fraction of each component. n is the total number of elements involved.

Table S1. The molar fraction of each element is calculated according to XPS.

|       | Mo   | W     | S     | Se    | Te    | $\Delta S_{mix}/R$ |
|-------|------|-------|-------|-------|-------|--------------------|
| MS    | 0.32 |       | 0.68  |       |       | 0.63               |
| MWS   | 0.28 | 0.036 | 0.684 |       |       | 0.74               |
| MWSS  | 0.24 | 0.05  | 0.61  | 0.1   |       | 1.02               |
| MWSST | 0.25 | 0.038 | 0.52  | 0.176 | 0.016 | 1.18               |

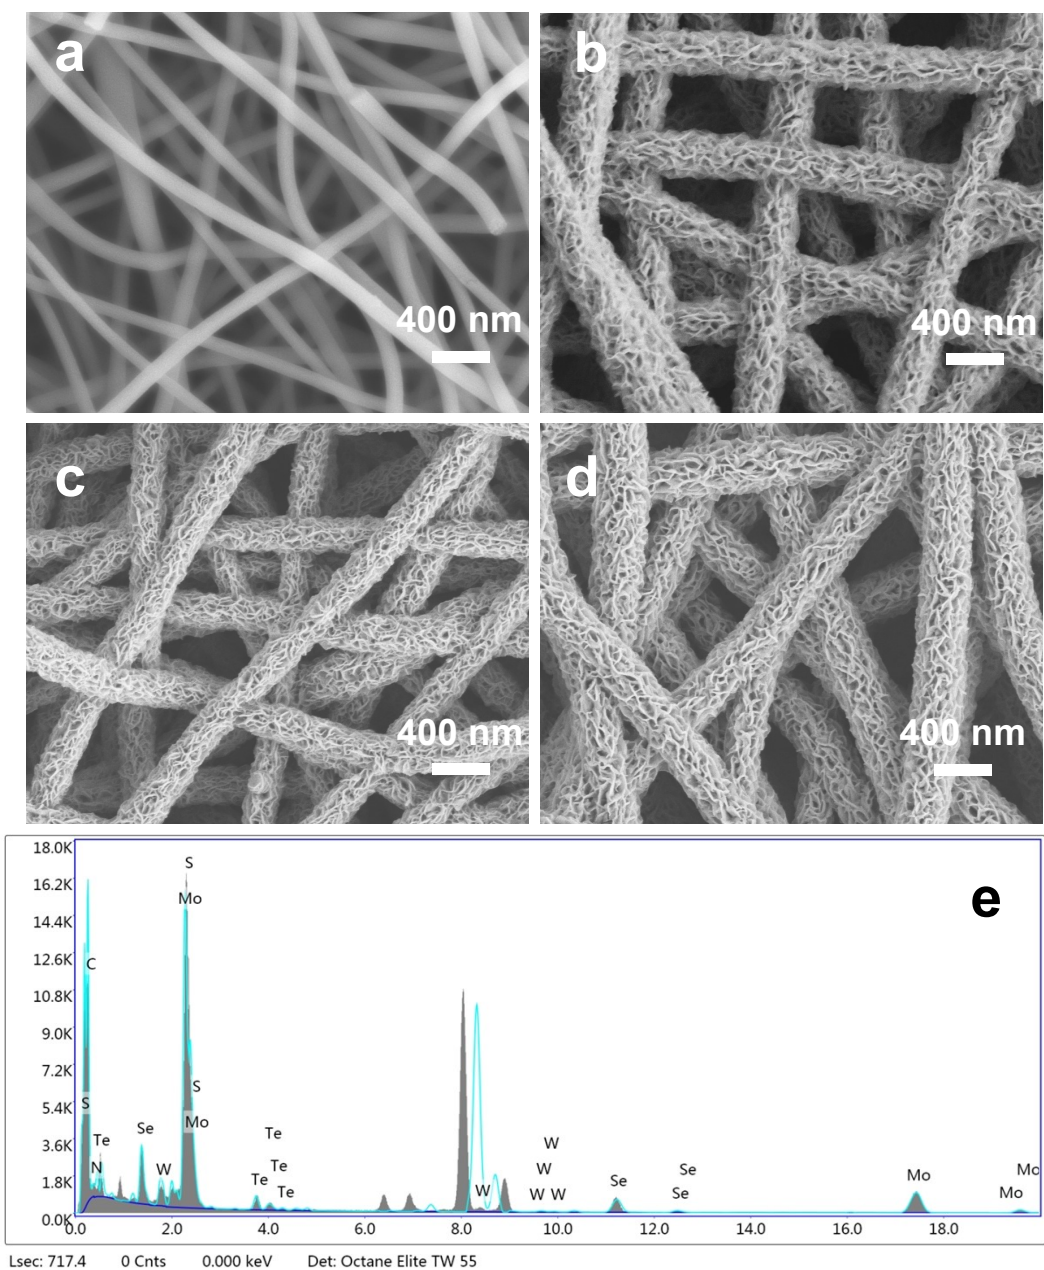

**Fig. S1** SEM images of **a** NCNF, **b** NCNF/MS, **c** NCNF/MWS, **d** NCNF/MWSS. **e** EDS spectrum of NCNF/MWSST

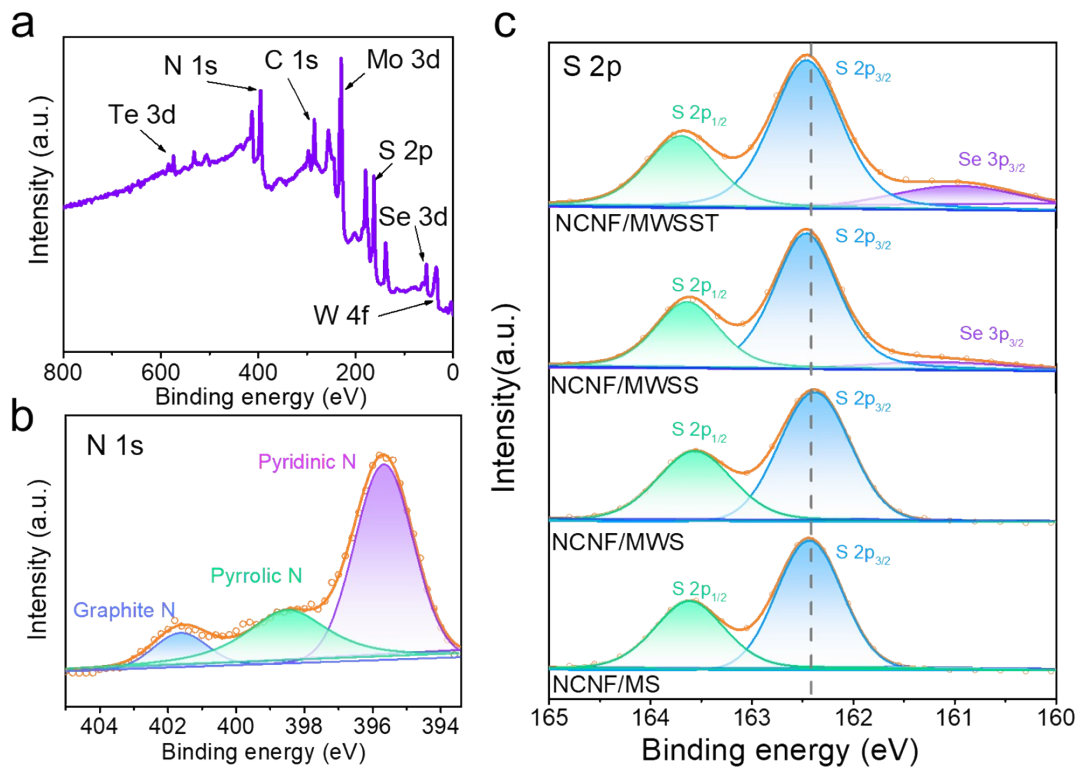

**Fig. S2** **a** Full XPS spectrum of the NCNF/MWSST. **b** N1s spectrum. **c** S 2p spectra of all the samples.

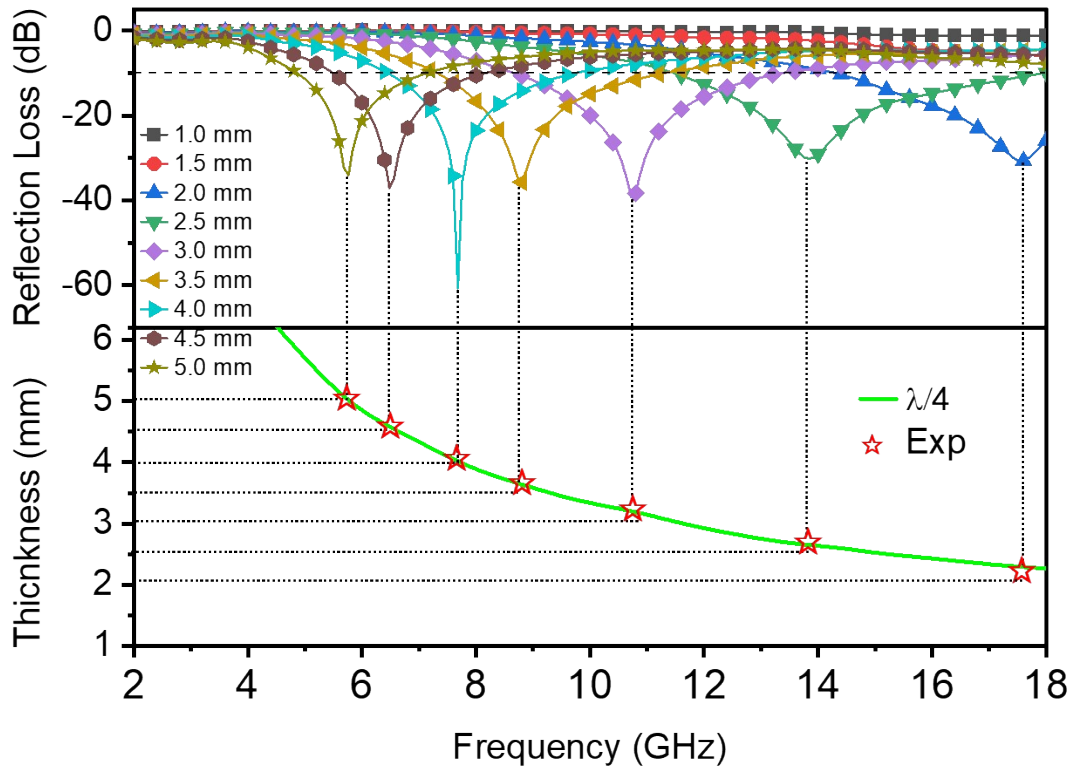

**Fig. S3** simulations of the thickness of NCNF/MWSST ( $t_m$ ) versus peak frequency ( $f_m$ ) of NCNF/MWSST under the  $\lambda/4$  model.

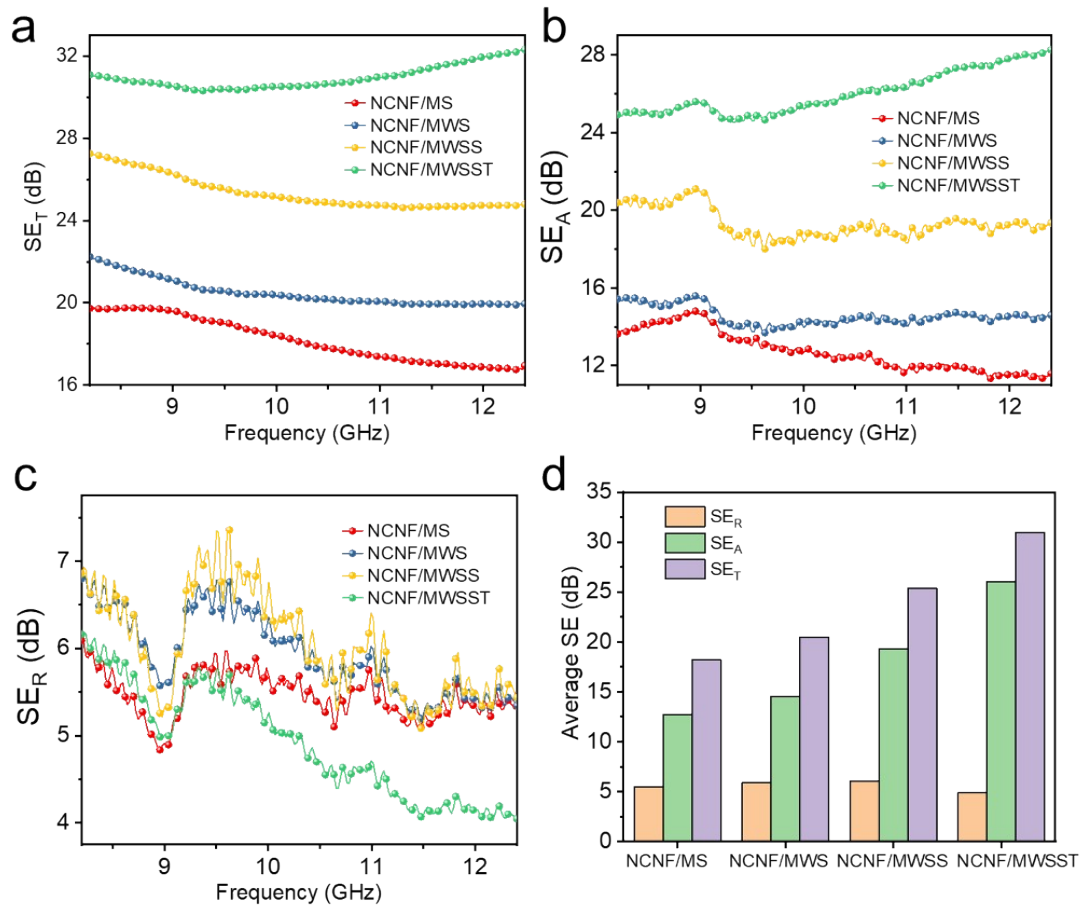

**Fig. S4** The EMI **a**  $SE_T$ , **b**  $SE_A$  and **c**  $SE_R$  of the samples. **d** Average absorption and reflection shielding effectiveness.

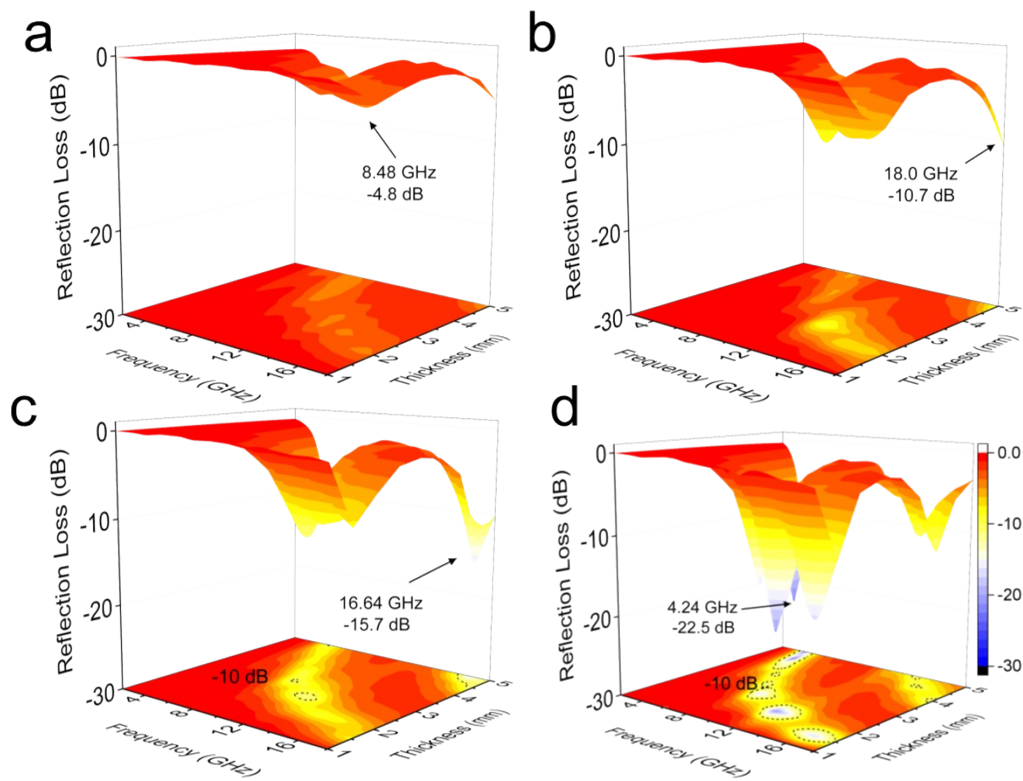

**Fig. S5** Frequency dependence of RL for the pure MX<sub>2</sub>: **a** MS, **b** MWS, **c** MWSS, and **d** MWSST.

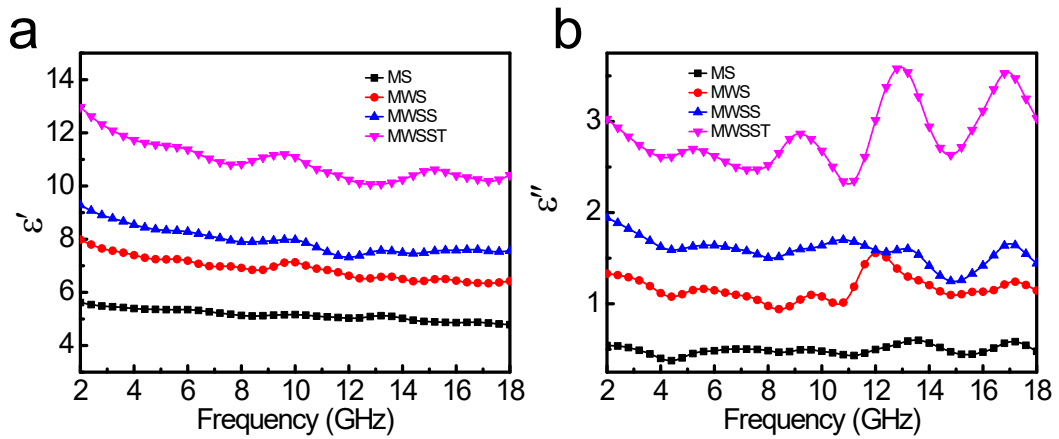

**Fig. S6 a** Real part and **b** imaginary part of complex permittivity of pure MS, MWS, MWSS, and MWSST.



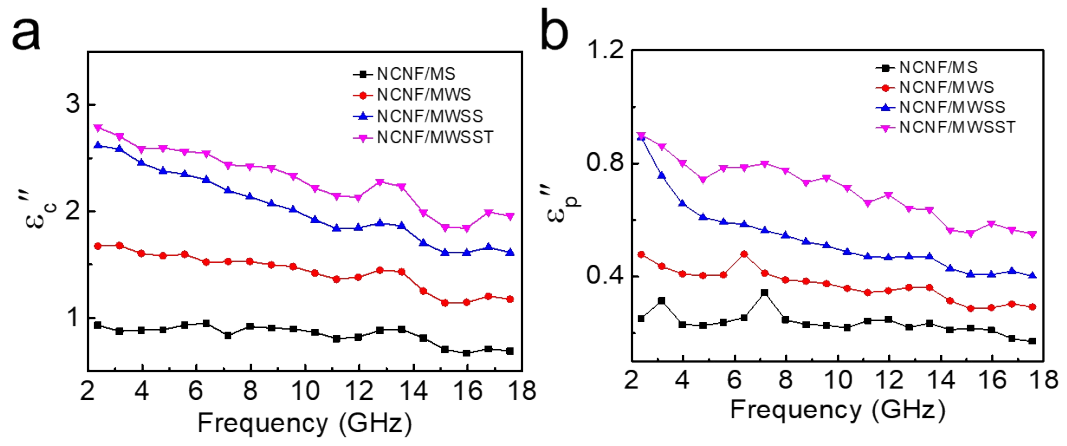

**Fig. S7 a** Conductive and **b** polarization loss of the as-prepared samples.

**Table S2** Comparison of the EMW absorption properties for NCNF/MWSST with other TMDs-based EMW absorbers in previous studies.

| sample                                                | RL <sub>(min)</sub><br>(dB) | d <sub>m</sub><br>(mm) | Loading<br>(wt.%) | EAB<br>(GHz) | Ref.      |
|-------------------------------------------------------|-----------------------------|------------------------|-------------------|--------------|-----------|
| 1T/2H MoS <sub>2</sub>                                | -45.5                       | 3.5                    | 50                | 3.89         | 1         |
| 1T/2H WS <sub>2</sub>                                 | -47.1                       | 2.2                    | 35                | 5.2          | 2         |
| MoSe <sub>2</sub>                                     | -36                         | 2.05                   | 50                | 5.7          | 3         |
| MoS <sub>2</sub> /MWCNT                               | -49.38                      | 1.7                    | 20                | 4.64         | 4         |
| CF/WS <sub>2</sub>                                    | -50                         | 2.8                    | 5                 | 3.5          | 5         |
| WSe <sub>2</sub> /CNT                                 | -60.4                       | 9                      | 50                | 4.24         | 6         |
| MnO <sub>2</sub> @NC@MoS <sub>2</sub>                 | -52.56                      | 2.4                    | 25                | 6            | 7         |
| Fe <sub>3</sub> O <sub>4</sub> /Fe@C@MoS <sub>2</sub> | -53.79                      | 2.24                   | 50                | 4.4          | 8         |
| CoFe <sub>2</sub> /C@MoS <sub>2</sub>                 | -66.8                       | 2.12                   | 30                | 5.32         | 9         |
| MoSe <sub>2</sub> /Co/C                               | -62.3                       | 2.05                   | 30                | 5.1          | 10        |
| NCNF/MWSS                                             | -33.8                       | 5                      | 10                | 6.16         | This work |
| NCNF/MWSST                                            | -60.7                       | 2.5                    | 10                | 6.48         | This work |

## Reference

1. M. Q. Ning, P. H. Jiang, W. Ding, X. B. Zhu, G. G. Tan, Q. K. Man, J. B. Li and R. W. Li, *Adv. Funct. Mater.*, 2021, **31**.
2. W. Ding, L. Hu, Q. C. Liu, Z. G. Sheng, J. M. Dai, X. B. Zhu and Y. P. Sun, *Appl. Phys. Lett.*, 2018, **113**.
3. Y. Cheng, Y. Zhao, H. Zhao, H. Lv, X. Qi, J. Cao, G. Ji and Y. Du, *Chem. Eng. J.*, 2019, **372**, 390-398.
4. H. Geng, Y. Guo, X. Zhang, Y. Zhang, X. Wang, P. Zhao, G. Wang, J. Liao and L. Dong, *J. Colloid Interface Sci.*, 2023, **648**, 12-24.
5. H. Chen, Z. Xu, Y. Zhou, M. Zhang, S. Feng, X. Bu, Z. Zhang and M. He, *Dalton Trans.*, 2023, **52**, 3085-3096.
6. Y. Han, J. Yuan, Y. Zhu, Q. Wang, L. Li and M. Cao, *J. Colloid Interface Sci.*, 2022, **609**, 746-754.
7. K. Yang, Y. Cui, Z. Liu, P. Liu, Q. Zhang and B. Zhang, *Chem. Eng. J.*, 2021, **426**, 131308.
8. Z. Tong, Z. Liao, Y. Liu, M. Ma, Y. Bi, W. Huang, Y. Ma, M. Qiao and G. Wu, *Carbon*, 2021, **179**, 646-654.
9. Z. Liao, M. Ma, Z. Tong, Y. Bi, K. L. Chung, M. Qiao, Y. Ma, A. Ma, G. Wu, X.

- Zhong and R. Sun, *Dalton Trans.*, 2021, **50**, 11640-11649.
10. J. Su, Z. Nie, Y. Feng, X. Hu, H. Li, Z. Zhao, S. Zan and S. Qi, *Compos. Part A Appl. Sci. Manuf*, 2022, **162**, 107140.
